# Supplementary material
Source: publisher site journal article supplement (https://www.dovepress.com/get_supplementary_file.php?f=274187.docx)
Supplement: Supplementary file 1 [file get_supplementary_file.php]

Supplementary Table1. The incidence of the five loci instability in these four cancers

|  | Microsatellite markers (Frequency, %) | | | | |
| --- | --- | --- | --- | --- | --- |
| Cancer type | BAT25 | BAT26 | D2S123 | D5S346 | D17S250 |
| Total (n=600) |  |  |  |  |  |
| [Endometrial](javascript:;) [cancer](javascript:;)s (n=150) | 14.7% (22/150) | 19.3% (29/150) | 10% (15/150) | 2.7% (4/150) | 1.3% (2/150) |
| Colorectal cancers (n=150) | 9.3% (14/150) | 10% (15/150) | 4.7% (7/150) | 3.3% (5/150) | 0.0% (0/150) |
| Liver [cancer](javascript:;)s (n=150) | 1.3% (2/150) | 1.3% (2/150) | 0.7% (1/150) | 0.7% (1/150) | 1.3% (2/150) |
| Gastric cancers(n=150) | 2.0% (3/150) | 2.7% (4/150) | 3.3% (5/150) | 2.0% (3/150) | 0.7% (1/150) |
| MSI-positive (n=49) |  |  |  |  |  |
| [Endometrial](javascript:;) [cancer](javascript:;)s (n=26) | 80.8% (21/26) | 96.2% (25/26) | 57.7% (15/26) | 15.4% (4/26) | 7.7% (2/26) |
| Colorectal cancers (n=15) | 93.3% (14/15) | 93.3% (14/15) | 46.7% (7/15) | 26.7% (4/15) | 0.0% (0/15) |
| Liver [cancer](javascript:;)s (n=4) | 50.0% (2/4) | 75.0% (3/4) | 0.0% (0/4) | 25.0% (1/4) | 50.0% (2/4) |
| Gastric cancers(n=4) | 75.0% (3/4) | 75.0% (3/4) | 75.0% (3/4) | 50.0% (2/4) | 0.0% (0/4) |

Supplementary Table 2. MSI Positive Cases in Multiple [Cancer](javascript:;)s

| Case no. | Age | Stage | Microsatellite markers | | | | |
| --- | --- | --- | --- | --- | --- | --- | --- |
|  |  |  | BAT25 | BAT26 | D2S123 | D5S346 | D17S250 |
| [Endometrial](javascript:;) [Cancer](javascript:;)s |  |  |  |  |  |  |  |
| 2 | 54 | IIIC (T3aN1M0) | + | + | + | - | - |
| 3 | 74 | IB (T1bN0M0) | + | + | + | - | - |
| 10 | 69 | IB (T1bN0M0) | + | + | - | - | - |
| 11 | 54 | IA (T1aN0M0) | + | + | - | - | - |
| 16 | 53 | IC (T1cN0M0) | - | + | + | - | - |
| 17 | 53 | IB (T1bN0M0) | - | - | + | - | + |
| 23 | 54 | IC (T1cN0M0) | + | + | + | - | - |
| 24 | 53 | IB (T1bN0M0) | + | + | - | - | - |
| 28 | 50 | IC (T1cN0M0) | + | + | - | + | - |
| 38 | 54 | IB (T1bN0M0) | - | + | - | + | - |
| 39 | 62 | IC (T1cN0M0) | + | + | - | + | - |
| 43 | 44 | IB (T1bN0M0) | + | + | - | - | + |
| 46 | 46 | IC (T1cN0M0) | + | + | - | - | - |
| 56 | 49 | IB (T1bN0M0) | + | + | + | - | - |
| 67 | 50 | IIIC (T2aN1M0) | + | + | + | - | - |
| 70 | 64 | IIA (T2aN0M0) | + | + | + | - | - |
| 78 | 36 | IB (T1bN0M0) | + | + | + | - | - |
| 79 | 55 | IIIC (T1bN1M0) | + | + | + | - | - |
| 81 | 51 | IB (T1bN0M0) | + | + | + | - | - |
| 85 | 42 | IIA (T2aN0M0) | + | + | - | - | - |
| 105 | 70 | IIA (T2aN0M0) | - | + | + | - | - |
| 116 | 63 | IIA (T2aN0M0) | + | + | + | + | - |
| 123 | 61 | IIA (T2aN0M0) | + | + | + | - | - |
| 126 | 51 | IIA (T2aN0M0) | + | + | - | - | - |
| 135 | 48 | IB (T1bN0M0) | - | + | + | - | - |
| 145 | 49 | IA (T1aN0M0) | + | + | - | - | - |
| Colorectal Cancers |  |  |  |  |  |  |  |
| 170 | 61 | IIB (T4aN0M0) | + | + | + | + | - |
| 188 | 24 | IIIB (T4aN1aM0) | + | + | - | - | - |
| 220 | 67 | IIB (T4aN0M0) | + | + | - | - | - |
| 228 | 67 | IIB (T4aN0M0) | + | + | - | - | - |
| 237 | 46 | IIB (T4aN0M0) | + | + | - | - | - |
| 240 | 73 | IIB (T4aN0M0) | + | + | + | - | - |
| 256 | 64 | IIB (T4aN0M0) | + | + | - | - | - |
| 260 | 42 | IIC (T4bN0M0) | + | + | + | - | - |
| 262 | 58 | IIB (T4aN0M0) | - | - | + | + | - |
| 264 | 84 | IIB (T4aN0M0) | + | + | - | - | - |
| 266 | 68 | IIB (T4aN0M0) | + | + | - | - | - |
| 271 | 51 | IIIC (T4aN2bM0) | + | + | - | - | - |
| 278 | 49 | IIIC (T4aN2bM0) | + | + | + | + | - |
| 288 | 53 | IIIB (T4aN1cM0) | + | + | + | - | - |
| 292 | 24 | IIIC (T4aN2bM0) | + | + | + | + | - |
| Liver [Cancer](javascript:;)s |  |  |  |  |  |  |  |
| 348 | 58 | IIIB(T4N0M0) | - | - | + | - | + |
| 385 | 41 | IIIB (T4N0M0) | - | - | - | + | + |
| 390 | 51 | IB (T1bN0M0) | + | + | - | - | - |
| 391 | 47 | IIIB (T4N0M0) | + | + | - | - | - |
| Gastric Cancers |  |  |  |  |  |  |  |
| 455 | 65 | IIA (T2N1M0) | + | + | + | + | - |
| 489 | 61 | IIA (T1bN1M0) | - | - | + | + | - |
| 577 | 66 | III (T4aN0M0) | + | + | - | - | - |
| 578 | 68 | IIB (T3N1M0) | + | + | + | - | - |
